# Table of Contents

## FEATURES

### *Special Feature: Clicker Reviews*

**Clicker Evolution: Seeking Intelligent Design**  
Maryfran Barber and David Njus .....1–8

**Clickers in the Large Classroom: Current Research and Best-Practice Tips**  
Jane E. Caldwell .....9–20

### *WWW.Life Sciences Education*

**Seeing Cells on the Web**  
Dennis Liu .....21–24

### *From the National Academies*

**Leadership Summit to Effect Change in Teaching and Learning: Undergraduate Education in Agriculture**  
Adam P. Fagen, Robin Schoen, and Jay B. Labov .....25–26

### *Book Review*

**From Genes to Embryo and Beyond**  
José Vázquez .....27–28

## ARTICLES

**Assessment of the Effects of Student Response Systems on Student Learning and Attitudes over a Broad Range of Biology Courses**  
Ralph W. Preszler, Angus Dawe, Charles B. Shuster, and Michèle Shuster .....29–41

**Using the Web to Encourage Student-generated Questions in Large-Format Introductory Biology Classes**  
James T. Colbert, Joanne K. Olson, and Michael P. Clough .....42–48

**What Good Is a Scientist in the Classroom? Participant Outcomes and Program Design Features for a Short-Duration Science Outreach Intervention in K–12 Classrooms**  
Sandra Laursen, Carrie Liston, Heather Thiry, and Julie Graf .....49–64

**Exploring DNA Structure with Cn3D**  
Sandra G. Porter, Joseph Day, Richard E. McCarty, Allen Shearn, Richard Shingles, Linnea Fletcher, Stephanie Murphy, and Rebecca Pearlman .....65–73

**A Summer Program Designed to Educate College Students for Careers in Bioinformatics**  
Beverly Krilowicz, Wendie Johnston, Sandra B. Sharp, Nancy Warter-Perez, and Jamil Momand .....74–83

*A goal of CBE—Life Sciences Education is to stimulate dialogue; therefore, readers are invited to submit comments on these articles through Letters to the Editor at <http://www.lifescied.org>.*

### *On the Cover*

The cover depicts keypad units, commonly referred to as “clickers,” from six different commercial brands of audience response systems, which are becoming more and more widely used in university, high school, and even elementary school classrooms. In a special feature on clickers on pp. 1–20, Barber and Njus compare the features, advantages, and disadvantages of these six systems, and Caldwell reviews the pedagogical literature on clickers along with some best-practice tips for their classroom use. In an article on p. 29, Preszler *et al.* present evidence for the enhancement of student learning and attitudes resulting from use of clickers in a range of university biology courses. Clicker photos courtesy of GTCO Calcomp (Interwrite PRS by Interwrite Learning, © 2007), Qwizdom, H-ITT, and David Njus.
